1 **A probabilistic functional parcellation of human occipito-temporal cortex**

2

3 Mona Rosenke<sup>1\*</sup>, Rick van Hoof<sup>2\*</sup>, Job van den Hurk<sup>2,3</sup>, Rainer Goebel<sup>2</sup>

4

5

6 <sup>1</sup> Department of Psychology, Stanford University, Stanford, CA, USA

7 <sup>2</sup> Department of Cognitive Neuroscience, Faculty of Psychology and Neuroscience, Maastricht University, Maastricht,  
8 The Netherlands

9 <sup>3</sup> Scannexus MRI Center, Maastricht, The Netherlands

10

11 \*authors contributed equally

12

13 **Corresponding Author:**

14 Rainer Goebel, Department of Cognitive Neuroscience, Faculty of Psychology and Neuroscience,  
15 Maastricht, The Netherlands, [r.goebel@maastrichtuniversity.nl](mailto:r.goebel@maastrichtuniversity.nl)

16

17

18

19

1 **Abstract**

2           Ventral visual cortex can be divided into a variety of retinotopically as well as category-  
3 specific regions. These brain areas have been the focus of a large body of functional MRI research,  
4 significantly expanding our understanding of high-level visual processing. As studying these  
5 regions requires accurate localization of their cortical location, it is usually necessary to perform  
6 functional localizer runs on an individual subject level. These runs are costly in terms of scanning  
7 time and a participant’s capacity level. Moreover, certain patient populations are unable to undergo  
8 such localizers, for instance the congenitally blind. In the current paper, we aimed to overcome  
9 these challenges by developing a functional atlas based on localizer- and visual field mapping data  
10 acquired in 20 healthy subjects. Single subject functional maps were aligned to both volume and  
11 surface group space, after which a probabilistic functional group atlas was created. We  
12 subsequently quantified the inter-subject variability of category-selective regions in visual cortex  
13 and the specificity of each atlas region – to our knowledge the first such analyses. Additionally,  
14 we validated our atlas against existing atlases of retinotopic as well as category-specific regions.  
15 The resulting functional atlas is made publicly available for a variety of software packages  
16 (<https://share.brainvoyager.com/index.php/s/m2E9oZTGWwXodRk>).

17

18

19 **Keywords:** visual cortex, human brain atlas, object recognition, retinotopy, cortex-based  
20 alignment

21

22

23

24

1 Human visual cortex can be divided into dozens of visual field maps (Arcaro et al., 2009;  
2 Wandell et al., 2005; Wandell and Winawer, 2011; Wang et al., 2014), as well as category-  
3 selective regions, each showing recognition expertise for specific visual categories, divided into  
4 three main processing streams (Goodale et al., 1991; Mishkin et al., 1983; Grill-Spector & Weiner,  
5 2014). While the dorsal stream consists mainly of visual field maps, the lateral and ventral visual  
6 streams contain visual field maps as well as category-selective regions. Those category-specific  
7 regions process categories like faces, houses, words, or bodies (e.g. *object-selective*: Malach et al.,  
8 1995; *face-selective*: Kanwisher, McDermott, & Chun, 1997; *place-selective*: Aguirre, Zarahn, &  
9 D’Esposito, 1998; Epstein & Kanwisher, 1998; *word-selective*: Cohen et al., 2000; *body-selective*:  
10 Peelen & Downing, 2005.

11 In order to study the detailed neural computations of these category selective regions in  
12 visual cortex, one has to identify their cortical location first. The standard method is to perform a  
13 functional localizer scan, identifying the region of interest (ROI) that is selectively responding to  
14 the category of interest (e.g. by using a t-statistic). Consequently, the experiment of interest is  
15 performed, and the data are analyzed within the ROI previously identified. ROI approaches are  
16 advantageous for a variety of reasons, among which: (1) they allow hypothesis driven comparisons  
17 of signals within a specific area of interest across different conditions, (2) they increase statistical  
18 sensitivity in multi-subject analyses (Nieto-Castañón and Fedorenko, 2012) and (3) they reduce  
19 the number of multiple comparisons present in whole-brain analyses (Saxe et al., 2006).  
20 Additionally, ROIs frequently serve as seed regions for connectivity analyses and computational  
21 modeling (El Gazzar et al., 2019; Kautzky et al., 2018; Rondina et al., 2018; Vakli et al., 2018).

22 While the individual localizer approach has its benefits, it also comes with problems: first,  
23 a localizer scan is subject-specific and not necessarily representative of the population. Second,  
24 performing an accurate localizer scan before each experiment is costly in terms of scanning time,  
25 as well as in attention for the subject. The latter can result in fatigue during the actual experiment.  
26 Lastly, in some cases it is not possible to obtain a localizer, for example in patient populations as  
27 for example the congenitally blind (Bedny et al., 2011; Mahon et al., 2009; Striem-Amit et al.,  
28 2012a, 2012b, Van den Hurk et al., 2017) and individuals with visual agnosia/prosopagnosia  
29 (Barton, 2008; Gilaie-Dotan et al., 2009; Schiltz and Rossion, 2006; Sorger et al., 2007; Steeves

1 et al., 2006; Susilo et al., 2015). However, it may still be of interest to investigate functional or  
2 anatomical patterns within those populations, for example to compare them to typical individuals.

3 To overcome these problems, progressions in the field of cognitive neuroscience have led  
4 to the development of cortical atlases which allow localization of specific regions in a new,  
5 independent set of subjects by leveraging ROI-data from typical populations (e.g. Eickhoff et al.  
6 2006, Frost and Goebel, 2012; Glasser et al., 2016; Rosenke et al., 2017; Wang et al., 2014). Next  
7 to providing independent data, this approach enables quantification of between-subject variability,  
8 as well as measures of prevalence and robustness of a region of interest. Recent atlases have  
9 mapped visual cortex retinotopically (Wang et al., 2014), cytoarchitectonically (Amunts et al.,  
10 2000; Caspers et al., 2013; Kujovic et al., 2013; Lorenz et al., 2015; Rosenke et al., 2017a;  
11 Rottschy et al., 2007) and using multimodal approaches (Glasser et al., 2016). To our knowledge,  
12 a gap in the field is a detailed atlas that delineates category-selective regions in lateral occipito-  
13 temporal and ventral temporal cortex.

14 In the present research, we aimed at (a) developing a functional atlas of category-selective  
15 visual cortex, (b) quantifying inter-subject variability of category-selective regions in visual  
16 cortex, and (c) validation of our atlas against existing atlases. We performed a localizer experiment  
17 in order to map category-selective regions, as well as a visual field mapping experiment to  
18 delineate early visual cortex in each participant. The experiment was performed using data of  
19 twenty healthy adults. The resulting atlas will be available in BrainVoyager  
20 ([www.brainvoyager.com](http://www.brainvoyager.com)) and FreeSurfer ([www.surfer.nmr.mgh.harvard.edu](http://www.surfer.nmr.mgh.harvard.edu)) file formats for  
21 surface analysis, as well as NifTI format for volumetric analysis  
22 (<https://share.brainvoyager.com/index.php/s/m2E9oZTGWwXodRk>).

23

## 24 **MATERIALS AND METHODS**

### 25 *Participants*

26 To obtain functional data, a total number of 20 participants (average age  $30 \pm 6.61$ ) were  
27 recruited at Maastricht University. Two participants were left-handed, and the sample consisted of

1 10 women and 10 men. All participants were healthy with no history of neurological disease and  
2 had normal or corrected-to-normal vision. Written consent was obtained from each subject prior  
3 to scanning. All procedures were conducted with approval from the local Ethical Committee of the  
4 Faculty of Psychology and Neuroscience. After data acquisition, one participant's functional MRI  
5 scans were excluded from further analysis due to self-reported lack of attention on the stimuli and  
6 intermittent sleep.

7

### 8 *Data acquisition*

9 Participants underwent one scanning session of 1 hour at a 3T Siemens Prisma Fit  
10 (Erlangen, Germany). First, a whole brain, high resolution T1-weighted scan (MPRAGE) was  
11 acquired (repetition time/echo time = 2250/2.21 ms, flip angle = 9 °, field of view = 256 x 256  
12 mm, number of slices = 192, 1 mm isovoxel resolution). Following that, six functional runs were  
13 acquired using a T2\*-weighted sequence with the following parameters: repetition time/echo time  
14 = 2000/30 ms, flip angle = 77 °, field of view = 200 x 200 mm, number of slices = 35, slice  
15 thickness = 2 mm, in-plane resolution = 2 × 2 mm.

16

### 17 *Visual localizers*

#### 18 Category-selective regions in ventral temporal cortex

19 In order to identify category-selective regions that respond preferentially to characters  
20 (pseudowords, numbers), bodies (whole bodies, limbs), places (houses, corridors), faces (child,  
21 adult) and objects (cars, instruments), we used stimuli included in the fLoc functional localizer  
22 package (Stigliani et al., 2015). Eight stimuli of one of the five categories were presented in each  
23 miniblock design, each miniblock holding a duration of 4 seconds. To assure participant's  
24 attention, they were asked to perform an Oddball task, indicating with a button press when they  
25 saw a scrambled image instead of one of the categories. Each run consisted of 150 volumes.

26

## 1 hMT+

2 To localize the motion-selective area in middle temporal cortex (hMT+, Dumoulin et al.,  
3 2000; Zeki et al., 1991), we used stimuli as in Emmerling et al. (2016) and Zimmermann et al.  
4 (2011), which were based on Huk et al. (2002). During the first 5 volumes participants were  
5 presented with a fixation dot in the center of the screen. In the following, blocks moving and  
6 stationary dot patterns were alternated while the participants fixated on the fixation dot in the  
7 center of the screen. Moving dot blocks were 18 seconds long, while stationary blocks in-between  
8 had a duration of 10 seconds. The active screen filled with dots was circular. In total, each run  
9 consisted of 12 blocks of moving dots and 12 blocks of stationary dots. Furthermore, dots were  
10 presented either in the center of the screen, in the left visual hemifield, or in the right visual  
11 hemifield, while participants maintained fixation to the center of the screen. Stationary blocks were  
12 in the same three locations. The order of blocks was fixed (center moving, center static, left  
13 moving, left static, right moving, right static). For the moving dot blocks, dots moved outward and  
14 inward to the center of the circular field (left, center, right) in a steady speed until they reached the  
15 boundary of the circle, where they diminished. Each subject underwent two hMT+ localizer runs.

16

## 17 Early visual cortex

18 The visual retinotopic mapping run consisted of 304 volumes (TR = 2s). In the first 8  
19 volumes a fixation dot was presented, followed by a high-contrast moving bar stimulus (1.33°  
20 wide) revealing a flickering checkerboard pattern (10 Hz). The checkerboard pattern varied in  
21 orientation and position for 288 volumes, concluding the run with 8 volumes of fixation dot  
22 presentation. The fixation was presented during the entire run and changed color at random time  
23 intervals. To keep participants' motivation and attention they were asked to count these color  
24 changes. The bar stimulus moved across the visual field in 12 discrete steps and remained at each  
25 position for 1 TR. The 12 different stimulus positions were randomized within each bar orientation.  
26 Each combination of orientation (4) and direction (2) represented one cycle. These eight different  
27 cycles were repeated three times in random order throughout the run (Senden et al., 2014). The  
28 width and height of the visual presentation subtended 15.5 x 15.5 degrees of visual angle.

1

## 2 *Preprocessing*

3        If not stated otherwise, data were preprocessed and analyzed using BrainVoyager 20.6  
4 (Brain Innovation, Maastricht, The Netherlands). Anatomical data were inhomogeneity corrected  
5 and transformed to Talairach space (TAL, Talairach and Tournoux, 1988) by identifying the  
6 anterior commissure (AC) and posterior commissure (PC) and fitting the data to TAL space.  
7 Functional data were slice scan time corrected, motion corrected with intra-run alignment to the  
8 first functional run to account for movement between runs, and high-pass filtered (3 cycles). Next,  
9 the preprocessed functional data were coregistered to the inhomogeneity corrected anatomical  
10 image. Using the anatomical transformation files, all functional runs were normalized to TAL  
11 space. Based on the normalized anatomical data, we segmented the grey-white matter boundary  
12 for each brain and created a cortical surface. Next, the volumetric functional data were sampled  
13 on the cortical surface incorporating data from -1 to +3 mm along the vertex normals. Ultimately,  
14 we computed two general linear models (GLM), one for the three localizer runs for category-  
15 selective regions in ventral temporal cortex, and one for the hMT+ localization.

16

## 17 *Regions of interest*

18        All ROIs were manually defined in individual subject space on the cortical surface  
19 construction in BrainVoyager. For volumetric alignment and atlas generation, surface regions were  
20 transformed to volumetric regions by expanding them (-1 to +2 mm) along the vertex normals of  
21 the white-gray matter boundary.

22

## 23 Retinotopic areas in occipital cortex

24        Visual field maps were determined for each subject based on an isotropic Gaussian  
25 population receptive Field (pRF) model (Dumoulin and Wandell, 2008; Senden et al., 2014). The  
26 obtained pRF maps estimating the location and size of a voxel pRF were used to calculate

1 eccentricity and polar angle maps. The polar angle maps were projected onto inflated cortical  
2 surface reconstructions and used to define six topographic regions in occipital cortex (V1d, V2d,  
3 V3d and V1v, V2v, V3v, where d = dorsal and v = ventral) by identifying the reversals in polar  
4 angle representation at the lower vertical meridian (LVM), upper vertical meridian (UVM) or  
5 horizontal meridian (HM; DeYoe et al., 1996; Engel et al., 1997; Sereno et al., 1995).

6

### 7 Ventral and lateral category-selective areas

8 Each category (e.g. faces) was contrasted against the mean of all other categories to identify  
9 vertices that displayed a preference for the given category. Then we followed a two-step approach  
10 to define ROIs: First, for all categories we selected a statistical threshold of  $t = 3$  for a whole brain  
11 map. Based on the thresholded activation map we identified ROIs in anatomically plausible  
12 locations (see details for each region below). Furthermore, in the case of an activation cluster  
13 transitioning into an adjacent one of the same visual category, we divided those clusters into  
14 separate ROIs by following the spatial gradient of t-values and separating the two areas at the  
15 lowest t-value. Based on insufficient activation pattern found for the ‘objects’ category, we  
16 dismissed that category from further analysis.

17 Face-selective regions (faces>all others) were identified in the mid lateral fusiform gyrus  
18 (mFus) and posterior lateral fusiform gyrus (pFus), which correspond to the fusiform face area  
19 (Kanwisher et al. 1997), as well as on the inferior occipital gyrus (IOG). Body-selective regions  
20 (bodies>all others) were observed in ventral temporal cortex on the occipital temporal sulcus  
21 (OTS), also known as fusiform body area (FBA, Peelen et al., 2009; Schwarzlose, 2005) and in  
22 lateral occipital cortex. There, we identified three different regions (Weiner and Grill-Spector,  
23 2011) together forming the extrastriate body area (Downing et al., 2001), one anterior of hMT+  
24 on the middle temporal gyrus (MTG), one posterior of hMT+ on the lateral occipital sulcus (LOS),  
25 and one ventral to hMT+, on the inferior temporal gyrus (ITG). Place-selective regions (places>  
26 all others) were observed in ventral temporal cortex on the collateral sulcus (CoS), corresponding  
27 to the parahippocampal place area (PPA, Epstein and Kanwisher, 1998), and on the transverse  
28 occipital sulcus (TOS, Hasson et al., 2003). Character-selective regions (characters > all others)



1 were identified in the posterior occipital temporal sulcus (pOTS) and a left-lateralized region in  
2 the mid occipital temporal sulcus (mOTS). Furthermore, we identified one character-selective  
3 regions in the inferior occipital sulcus (IOS). In the following, we will refer to each ROI by its  
4 anatomical nomenclature, as described in Stigliani et al. (2015). For reference, Table 1 provides  
5 an overview about each ROI's anatomical as well as functional name.

6

| anatomical        | functional |
|-------------------|------------|
| mFus - faces      | FFA-2      |
| pFus - faces      | FFA-1      |
| IOG - faces       | -          |
| OTS - bodies      | FBA        |
| ITG - bodies      | EBA        |
| MTG - bodies      | EBA        |
| LOS - bodies      | EBA        |
| pOTS - characters | VWFA-1     |
| IOS - characters  | -          |
| TOS - places      | -          |
| CoS - places      | PPA        |
| hMT - motion      | hMT        |

7

8 **Table 1. Nomenclature for functional regions-of-interest (fROIs).** Each category-selective functional activation  
9 cluster can be described by functional category or anatomical location. In this article we describe category-selective  
10 ROIs using the anatomical nomenclature and provide this table as a reference. Functional abbreviations are as  
11 followed: *FFA*: fusiform-face area, *FBA*: fusiform-body area, *EBA*: extrastriate body area, *VWFA*: visual word form  
12 area, *PPA*: parahippocampal place area, *hMT*: human middle-temporal (cortex).

13

14 hMT+

15 Motion selective regions were identified by contrasting left, right and central visual field  
16 motion conditions vs. the equivalent stationary conditions and using a thresholded statistical map

1 with a minimum t-value of 3. Two subjects only showed functional activation for the contrasts at  
2 a t value of 2.5 in one hemisphere, which we allowed for these subjects. hMT+ was consistently  
3 located in the posterior inferio-temporal sulcus (pITS).

4

#### 5 *Visual functional atlas (visfAtlas) generation*

6 After ROIs were defined for each subject in each subject's space, we utilized two  
7 normalization techniques to bring the data into a common space: (1) nonlinear-volumetric  
8 alignment (NVA) for volume and (2) cortex-based alignment (CBA) for surface space.  
9 Furthermore, as it is common that not every ROI can be identified in each of the subjects, we  
10 decided that an ROI had to be present in more than 50% of the subjects ( $N > 10$ ) to be considered  
11 for a group atlas. The ROIs which were ultimately used for the group atlases and in how many  
12 subjects they were defined can be found in Table 2.

13

| ROI               | N (LH) | N (RH) |
|-------------------|--------|--------|
| mFus - faces      | 13     | 15     |
| pFus - faces      | 17     | 15     |
| IOG - faces       | 14     | 15     |
| OTS - bodies      | 14     | 13     |
| ITG - bodies      | 17     | 17     |
| MTG - bodies      | 16     | 15     |
| LOS - bodies      | 15     | 16     |
| pOTS - characters | 16     | -      |
| IOS - characters  | 11     | -      |
| TOS - places      | -      | 12     |
| CoS - places      | 18     | 18     |
| hMT - motion      | 18     | 16     |
| V1d               | 19     | 19     |
| V2d               | 19     | 19     |
| V3d               | 14     | 16     |
| V1v               | 19     | 19     |
| V2v               | 19     | 19     |
| V3v               | 17     | 19     |

14

1 **Table 2. Number of subjects per functional ROI (fROI).** Individual variability across people, keeping a strict  
2 statistical threshold, and stimulus choices results in not every fROI being identified in all participants. We chose to  
3 exclude ROIs from atlas generation that were defined in less than half the participants (N = 10). Abbreviations: *LH*:  
4 left hemisphere, *RH*: right hemisphere.

5

## 6 Nonlinear-volumetric alignment (NVA)

7 First, surface regions that were defined on each subject's cortical surface were mapped to  
8 volumetric regions by expanding them (-1 to +2 mm) along each vertex normal of the white-gray  
9 matter boundary. Second, the volumetric regions were transformed back to native ACPC space.  
10 Next, the individual brains were registered to the MNI152 group average brain using the Advanced  
11 Normalization Tools (ANTs; <https://sourceforge.net/projects/advants/>). Finally, the resulting  
12 nonlinear transformation matrices were used to warp the functionally-defined regions of interest  
13 (fROIs) into the same orientation and reference frame. The specific code for the affine volume  
14 registration and nonlinear transformation can be found here:  
15 <https://share.brainvoyager.com/index.php/s/m2E9oZTGWwXodRk>. The resulting NVA-aligned  
16 regions were further processed in NifTi format using MATLAB ([www.mathworks.com](http://www.mathworks.com)), see  
17 details below.

18

## 19 Cortex-based alignment (CBA)

20 To generate a surface group average brain of the subjects, we used cortex-based alignment  
21 (CBA) to generate a dynamic average (subsequently called BVaverage, publicly available at  
22 <https://share.brainvoyager.com/index.php/s/m2E9oZTGWwXodRk>). CBA was performed for  
23 both hemispheres separately after inflation to a sphere with overlaid curvature information at  
24 various levels of resolution (Frost and Goebel, 2012; Goebel et al., 2006). First, during a rigid  
25 alignment, the spheres of each subject's hemisphere was rotated along three dimensions to best  
26 match the curvature pattern of a randomly chosen target hemisphere. The lower the variability  
27 between the two folding curvature patterns, the better the fit after rigid sphere rotation. Following  
28 the rigid alignment for all subjects, a non-rigid CBA was performed. Curvature patterns of each

1 subject were used in four different levels of anatomical detail. Starting from low anatomical detail,  
2 each subject's hemisphere was aligned to a group average out of all subjects. During this process,  
3 the group average was dynamically updated to most accurately average all hemispheres. This  
4 sequence was repeated for all levels of curvature detail, until the group average was updated based  
5 on the highest level of anatomical detail per subject. During the alignment, we (1) derived a group  
6 average for each hemisphere (BVaverage), as well as (2) a transformation indicating for each  
7 vertex on a single-subject cortical surface where it maps to on the group average. These  
8 transformation files were then used to map each individual subject's fROIs to the BVaverage.

9

### 10 Probabilistic maps for occipitotemporal cortex in volume and surface space

11 We generated probabilistic maps of all regions after NVA as well as CBA and each of the  
12 following was done in both group spaces: after individual subject fROIs were projected to the  
13 MNI152 and BVaverage, respectively, each group fROI was defined. For each voxel/vertex of a  
14 group fROIs, the number of subjects which shared that voxel/vertex of the fROI was divided by  
15 the total number of subjects ( $voxel\ probability = \frac{number\ of\ subjects\ sharing\ voxel/vertex}{total\ number\ of\ subjects\ in\ fROI}$ ). Thus, a value of  
16 0 at a vertex in the group fROI indicates a vertex did not belong to that fROI in any subject, a value  
17 of .5 means that it belonged to the fROI in half the subjects, a value of 1 indicates that it belonged  
18 to that functional region in the entire study population (Fig. 1).

19

### 20 Cross-validated predictability estimation and atlas generation

21 One interesting feature of those fROIs is the possibility to serve as a prior to estimate the  
22 localization of corresponding ROIs in a new subject's brain, eliminating the need for a dedicated  
23 localizer run in the new subject. To allow for a reasonable estimate on the confidence to find this  
24 region in a new subject, we performed an exhaustive cross-validation analysis of the volumetric  
25 (NVA) as well as surface (CBA) alignment. For each fold, we generated a group probabilistic fROI  
26 (G) and a left-out subject's individual fROI (I). We estimated the predictability of the group

1 probabilistic fROI by calculating the dice coefficient (DSC), a measure of similarity of two  
2 samples:

3

$$4 \quad dsc = \frac{2|I \cap G|}{|I| + |G|}$$

5

6 A dice coefficient of zero indicates no predictability and a dice coefficient of 1 indicates perfect  
7 predictability. As we did in previous work (Rosenke et al., 2017a), we applied different threshold  
8 levels to the group probabilistic fROI (G) to predict the location of the left-out-subject (Fig.2).  
9 That means we created a liberal group probabilistic fROI including each vertex that was present  
10 in at least 1 subject. Then we sequentially increased the threshold up to the most conservative  
11 threshold where all subjects had to share a voxel/vertex for it to be included in the group map. For  
12 statistical assessment, we compared dice coefficients across the two alignment methods using a  
13 repeated measures analysis of variance (ANOVA) with individual regions as different entries,  
14 alignment method (CBA vs NVA) as within-subject factor and hemisphere as between-subject  
15 factor. We ran this comparison on two different thresholds: once on unthresholded group maps,  
16 and once on a threshold that produced - across regions and methods - the highest predictability,  
17 0.2. Additionally, we ran paired permutation tests within each region on dice coefficient results at  
18 threshold 0.2. Finally, we calculated the mean ROI size for each hemisphere and ROI in square  
19 millimeter (mm<sup>2</sup>, Fig. 3) and used a paired t-statistic to assess whether there was a systematic  
20 hemispheric difference in size across ROIs.

21

## 22 Generating a visual functional atlas (visfAtlas) by assigning each voxel and vertex to a unique 23 fROI

24 The processes described below provide a non-overlapping tiling of the functionally defined  
25 regions in occipito-temporal cortex in surface as well as volume space (Fig. 4).

26 *Cortex based alignment:* The probability maps determine the probability that each vertex belongs  
27 to a given fROI. However, it is possible that a point on the brain may belong to more than one

1 probabilistic fROI. This overlap is more likely to occur along boundaries of neighboring functional  
2 regions. In order to assign a unique functional label to each vertex in the atlas, we generated a  
3 maximum-probability map (MPM) of each area, once in volume space (NVA) and once in surface  
4 space (CBA). Using the probabilistic fROIs, we determined which vertices were shared by more  
5 than one probabilistic fROI and assigned these vertices to a single fROI based on the area which  
6 showed the highest probability at that vertex (Eickhoff et al., 2005). In cases where two areas held  
7 the same probability value for one vertex, we averaged the probabilistic values of neighbors of that  
8 vertex for each of the fROIs. The degree of neighbors averaged was increased until the vertex had  
9 a higher probability value in one of the areas. Lastly, after all vertices were assigned in each of the  
10 MPM areas, we searched for individual vertices that were not connected to other vertices of the  
11 same ROI. We used a decision threshold where a minimum of at least one 3<sup>rd</sup> degree neighbor for  
12 each vertex had to be in the same group ROI for that vertex to be part of the group ROI. In cases  
13 where single vertices were detected, they were assigned to the ROI with the second-highest  
14 probabilistic value and same-ROI vertices in the immediate neighborhood.

15 *Nonlinear volume alignment:* The creation of a maximum probability map in volume space was  
16 identical to that for CBA as described above, except for the neighborhood search. The  
17 neighborhood search was not implemented in the same way as the 3D nature of the volume atlas  
18 would lead to inevitable differences in the MPM creation when compared to the surface atlas.  
19 Instead, neighborhood search was only performed for 3 immediately adjacent voxel (3<sup>rd</sup> degree  
20 neighbor) in all three dimensions.

21

22 *A visual functional atlas available in volume and surface space*

23 The unique tiling of functionally defined visua regions provides a functional atlas  
24 (visfAtlas) which we make available (1) in volume space, and (2) in surface space. In addition, we  
25 make this atlas available in multiple file formats. *Volume:* we publish the volumetric visfAtlas in  
26 MNI space in BrainVoyager file format (VOI file) and NifTi format, which can be read by a variety  
27 of software packages. *Surface:* we publish the visfAtlas in file formats compatible with Brain  
28 Voyager as well as FreeSurfer. Note, however, that the surface atlases are generated slightly

1 differently for each software. For BrainVoyager, we generated a publicly available dynamic group  
2 average brain (BVaverage) that will be available with the distributed atlas, details are described  
3 above. Since FreeSurfer (<https://surfer.nmr.mgh.harvard.edu/>) is commonly used with the  
4 fsaverage brain, an average surface of 39 individuals, we converted the individually defined fROIs  
5 from each subject to cortical surface space in FreeSurfer after running each subject through the  
6 recon-all pipeline. Then, we used the FreeSurfer CBA algorithm to bring each subject's fROIs to  
7 the fsaverage space. Further processing was done as described above and the same for both  
8 softwares. All files can be downloaded here:  
9 <https://share.brainvoyager.com/index.php/s/m2E9oZTGWwXodRk>.

10

### 11 *Functional selectivity of atlas fROIs*

12 When using a probabilistic atlas, it is of great interest not only to know how likely one  
13 would find a new subject's fROI in the same location, but also what signals would be picked up  
14 for that subject within an atlas-fROI. For example, are voxel/vertices in face-selective atlas fROIs  
15 selective for faces? To test the generalizability of our atlas, we performed a leave-subject-out  
16 selectivity analysis in volume space. Although alignment in surface space leads to an overall better  
17 between-subject alignment than normalized volume space does, we decided to run the cross-  
18 validation in suboptimal volume space, thereby assessing the results in a conservative way. The  
19 analysis calculates the percentage of voxel selective for each condition within a given fROI, where  
20 the fROI is defined on all subject's data except the one dataset used for the selectivity computation.  
21 This was repeated for all possible leave-subject-out combinations. First, for each subject  
22 individually we created a volume maximum probability map (MPM) based on the other N-1  
23 subjects (leaving the target subject out). Then, for each individual voxel within each fROI in this  
24 MPM, we estimated the average response amplitude to each category across trials using the  
25 optimized Least Squares – Separate (LS-S) trial estimation approach as described by Mumford et  
26 al. (2012). Then, we created a 'winner map' for each fROI per subject, in which the condition  
27 index that yielded the strongest response was assigned to each voxel within the fROI. Per  
28 condition, we counted the number of winning voxels within the ROI, which we expressed as a

1 percentage of the total number of voxels in the fROI. This procedure was repeated for each subject  
2 (Fig. 5).

3

#### 4 *Comparison of our visfAtlas to existing publicly available atlases and relevant fROIs*

5 How does the visfAtlas compare to published atlases available? While there is no complete  
6 occipitotemporal atlas yet, retinotopic areas have been published by Wang et al. (2014), a  
7 probabilistic CoS-places by Weiner et al. (2018) and a motion selective area hMT+ by Huang et  
8 al. (2019). We compared our visfAtlas to the existing surface maps by assessing their  
9 correspondence in Freesurfer's fsaverage space. For each fROI, we superimposed our MPM-ROIs  
10 onto the existing atlas-ROI (Fig 6). We quantified their correspondence by calculating the dice  
11 coefficient (see details in previous section) between our visfAtlas MPM-ROI and the respective  
12 other atlas. However, as the hMT+atlas by Huang et al. (2019) was not constrained by other  
13 regions, we calculated the dice coefficient between the extent of our probabilistic map and their  
14 fROI. Specifically, our hMT+ atlas-ROI is constrained by surrounding body-selective regions that  
15 compete for voxel selectivity. For the atlas generation in Huang et al. (2019), however, no  
16 functional activations other than motion-selectivity were used when defining the atlas-hMT,  
17 making a comparison of both atlases an unequal comparison.

18

## 19 **RESULTS**

### 20 *Superior spatial overlap after cortex-based alignment for retinotopic and category selective* 21 *regions*

22 Using data from 19 healthy participants we aimed at generating a probabilistic atlas of  
23 occipito-temporal and ventral temporal cortex. Individually defined regions were normalized to  
24 group space using either (1) cortex based alignment (CBA) or (2) nonlinear volumetric alignment  
25 (NVA). Figure 1 displays three example regions, one early visual retinotopic region in occipital  
26 cortex (v1d), as well as two higher-order category-selective regions in ventral temporal cortex



1 (Cos-bodies and mFus-faces). Qualitatively, this resulted in a higher degree of consistency across  
2 subjects when group maps were normalized using CBA as compared to NVA. Both v1d and Cos-  
3 places display a high consistency in the group map center as indicated by yellow colored vertices,  
4 while centers are more variable after NVA alignment, most evident in v1d. For mFus-faces, both  
5 group maps display a greater degree of variability across subjects than the other two regions,  
6 potentially due to region size and/or greater anatomical variability.

7

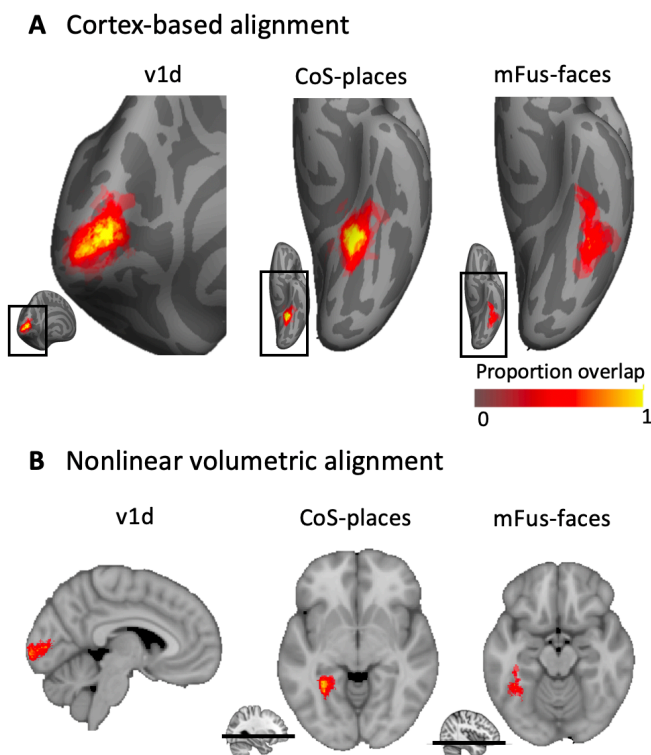

8

9 **Figure 1. Example probabilistic group maps in the left hemisphere after two brain alignments. (A)** Three  
10 example regions-of-interest (ROIs) are displayed where the most left column, v1d, shows an early visual cortex map  
11 and the middle and right columns display two higher-order visual category-selective regions in ventral temporal  
12 cortex, Cos-places and mFus-faces. Probability values range from 0 to 1 where 0 indicates no subject at a given vertex  
13 and 1 that all subjects in the probabilistic maps shared the given vertex. mFus-faces reveals less consistency as shown  
14 by a lower percentage of yellow-colored vertices. Bottom inset displays zoomed in location of the main figure. **(B)**  
15 Same ROIs as in A but after nonlinear volumetric alignment (NVA). Bottom inset for CoS-places and mFus-faces  
16 indicates the location of the axial slice in the volume.

1

2 To quantify which group alignment resulted in higher consistency and therewith  
3 predictability, we used the dice coefficient (DSC) and a leave-one-out cross-validation procedure  
4 to determine the predictability of finding the same region in a new subject. Moreover, we  
5 calculated the dice coefficient using different thresholds for the probabilistic group map, ranging  
6 from a liberal unthreshold (one subject at a given voxel/vertex is enough to assign it to the group  
7 map) maps to a conservative threshold where all N-1 subjects had to share a voxel/vertex to be  
8 assigned to the group map (Fig. 2).

9 For retinotopically defined regions, DSC's varied between 0.35 and 0.55 for peak  
10 probability after CBA, and between 0.30 and 0.40 after NVA. Especially regions with a lower  
11 predictability overall tended to show superior predictability after NVA for more conservative  
12 group thresholds (e.g. Fig. 2b, mFus-faces, TOS-bodies). For CBA, peak predictability (DSC) for  
13 each region ranged from 0.1 to 0.55, while it ranged from 0.1 to 0.42 for NVA, with character-  
14 selective regions showing the lowest consistency for both alignments, closely followed by mFus-  
15 and IOG-faces. As the smaller regions seemed to show a greater variability we correlated ROI size  
16 (Fig. 3) with DSCs at a threshold of 0.2.

17 Quantitatively, CBA displayed an overall greater predictability across regions and  
18 thresholds (except for v3d), which was confirmed by a significant difference in alignment for both  
19 unthresholded ( $F(1,34) = 20.12, p < .001$ ) and thresholded (0.2) probability maps, matching the  
20 highest DSC across regions and alignments ( $F(1,34) = 174.84, p < .001$ ). Additionally, there was  
21 no significant main effect for hemisphere (unthresholded:  $p = .90$ ; thresholded:  $p = .56$ ) and no  
22 interaction between alignment and hemisphere (unthresholded:  $F(1,34) = .85, p = .36$ , thresholded:  
23  $F(1,34) = 0.35, p = .56$ ). We followed up with a paired permutation test (across alignments) for the  
24 unthresholded DSC within each fROI. As there was no main effect for hemisphere (see above) and  
25 no significant difference in region size across hemispheres ( $t(17) = -0.48, p = .64$ , Fig. 3),  
26 permutation tests were performed on dice coefficients using an unthresholded group map  
27 prediction and averaged across hemispheres. Results show that CBA alignment has a higher  
28 predictability than NVA for all regions ( $p < .05$ ), except for unthresholded: pOTS-characters ( $p =$

1 1), IOS-characters (p = .81), v3d (p = .05), IOG-faces (p = .05) and thresholded: v3d (p = .05),  
 2 mFus (p = .70), IOG (p = .55), pOTS (p = 1), IOS (p = 1), OTS (p = .14).

3

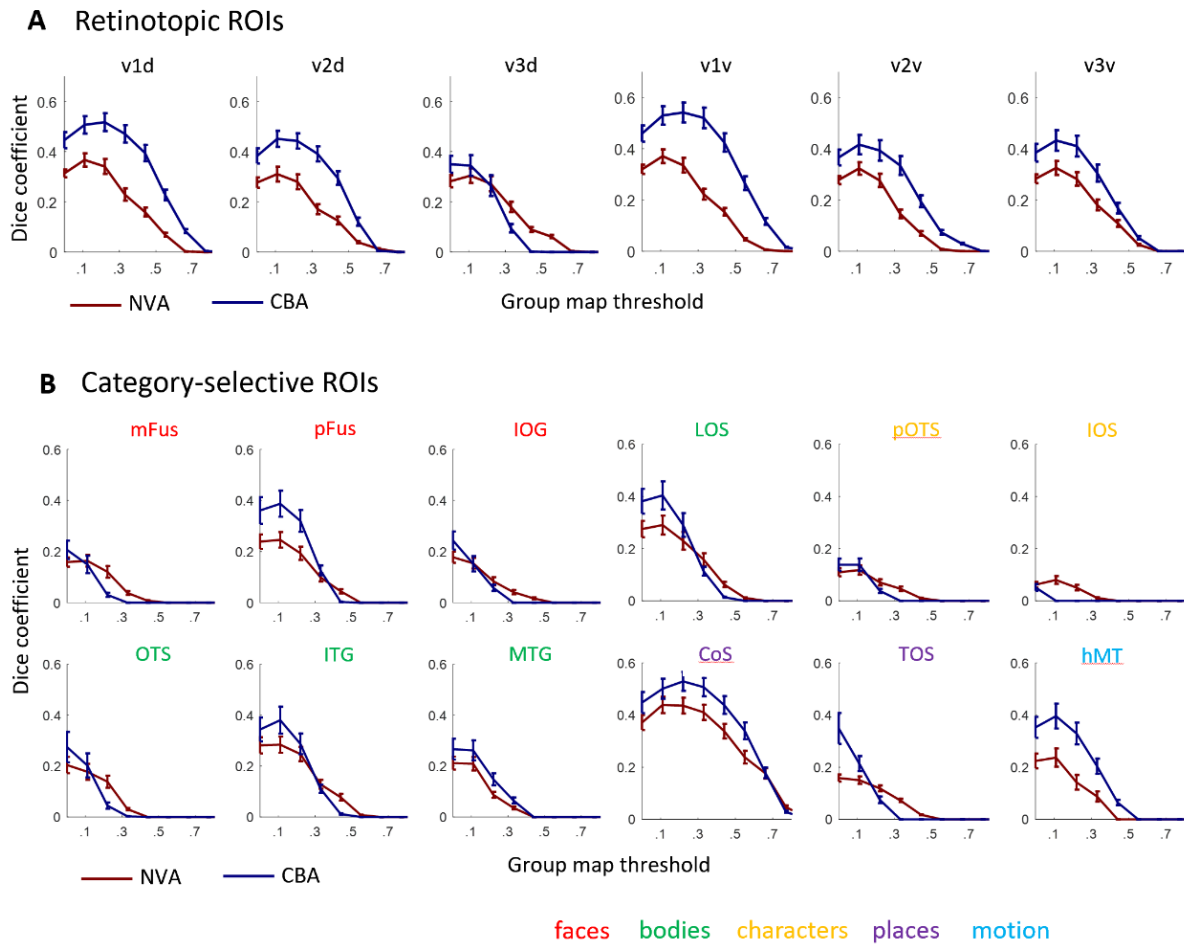

4

5 **Figure 2. Leave-one-out cross-validation predictability analysis using the dice coefficient (DSC) for retinotopic**  
 6 **regions (A) and category-selective regions (B).** *x*-axis: threshold of the probability map generated using N-1  
 7 subjects, *y*-axis: DSC. A DSC value of 1 indicates perfect overlap between the N-1 group map and the left out subject  
 8 0 indicates no overlap. *Blue lines*: DSC after CBA, *red lines*: DSC after NVA. Results for left and right hemisphere  
 9 were averaged per alignment method. *Red*: face-selective ROIs, *green*: body-selective ROIs, *yellow*: character-  
 10 selective ROIs, *light blue*: motion-selective ROI, *error bars*: standard error (SE) across the N-fold cross-validation.

11

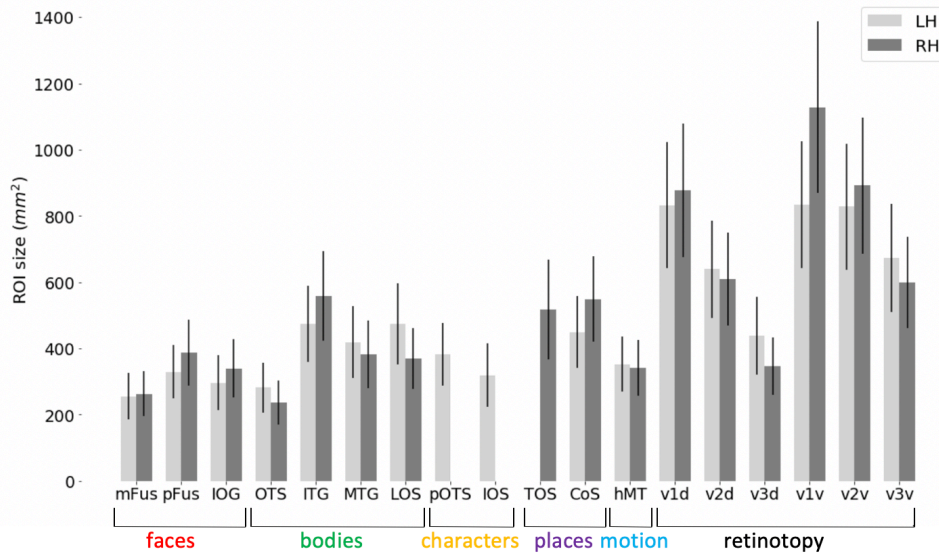

1

2 **Figure 3. fROI size across occipito-temporal cortex.** Average ROI size in surface space separately for the left  
3 hemisphere (LH, *light gray*) and right hemisphere (RH, *dark gray*). *Error bars*: standard error across subjects. Regions  
4 of X-axis are organized by category.

5

6 *A functional atlas of occipito-temporal cortex in volume and surface space*

7 By systematically varying the group map threshold for predicting a left-out subject's fROI,  
8 we established that a group map threshold of 0.2 allows for greatest predictability across regions.  
9 Using the 0.2 threshold, we generated a functional atlas of occipito-temporal cortex by generating  
10 a maximum probability map (MPM, see Methods for details). Figure 4 displays the resulting  
11 unique tiling of category-selective regions in stereotaxic space for surface (Fig. 4A) and volume  
12 (Fig. 4B) space. The visfAtlas is publically available in both surface as well as volume space to  
13 allow usage in a variety of analyses and in file formats for BrainVoyager and FreeSurfer for surface  
14 space as well as in volume space using the NifTi format  
15 (<https://share.brainvoyager.com/index.php/s/m2E9oZTGWwXodRk>).

1

## A Surface visfAtlas

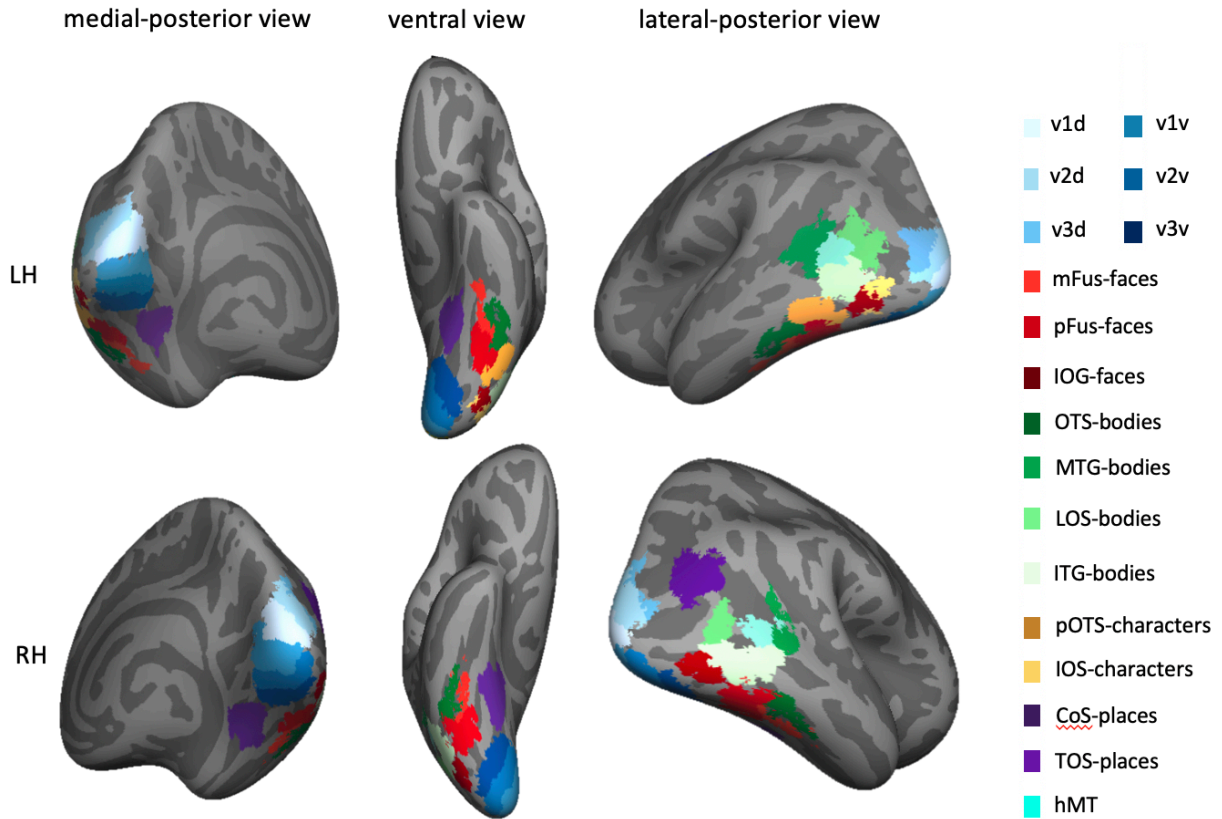

## B Volume visfAtlas

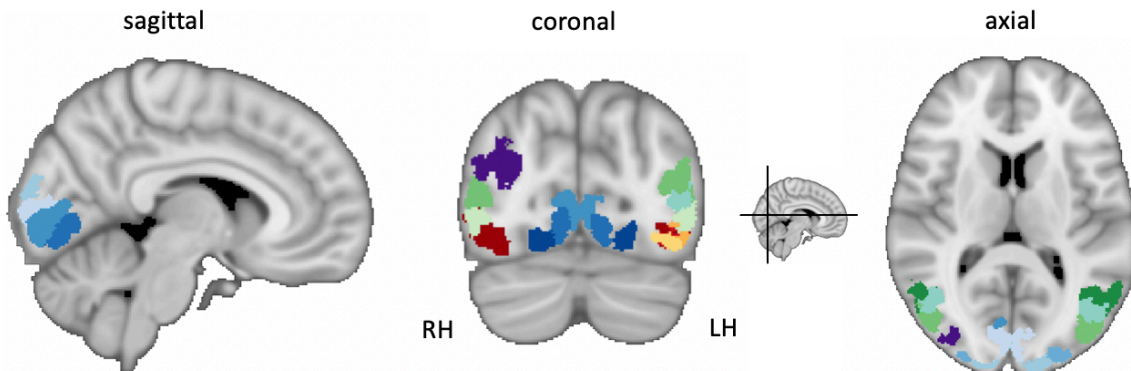

2

3 **Figure 4. Maximum-probability map (MPM) of occipito-temporal cortex functional regions-of-interest**  
4 **(fROIs).** (A) visfAtlas in surface space after cortex-based alignment. Each color displays a unique fROI group map  
5 thresholded at 0.2 of all subjects in which the given fROI could be identified. (B) Volume atlas using the same color  
6 coding as in surface space. Inset between coronal and axial view displays the slice location for coronal and axial slices,  
7 respectively. *LH*: left hemisphere, *RH*: right hemisphere.

1

## 2 *Generalizability of functional selectivity*

3           One of the advantages of a probabilistic atlas is the ability to locate a region of interest with  
4 a degree of certainty (as established using the dice coefficient analysis) in a new subject without  
5 the need to run a localizer itself. In order to quantify the atlas' generalizability, the selectivity of  
6 the category selective areas in new participants is a crucial metric. Therefore, we performed a  
7 leave-subject-out selectivity analysis in volume space to assess category-selectivity. For each  
8 fROI, we established the percentage of voxels that showed the strongest response to each available  
9 category (Fig. 5, see Methods for details of selectivity estimation). For all category selective  
10 regions, we confirmed that the category it is selective for indeed yields the highest percentage of  
11 voxels across subjects. Face-selective fROIs (Fig. 5, top left) contain 52-72% (lowest to highest  
12 fROI) face-selective voxel responses (*red*). The second-highest selectivity is body-selective  
13 (*green*) with 10-43% on average across subjects, followed by character-selective regions (*gray*)  
14 with 2-25%. Body-selective regions (Fig. 5, top right) contain the highest proportion of body-  
15 selective voxels for lateral bod-selective regions (80-94%), with lowest proportions for ventral  
16 OTS-bodies in left and right hemisphere (46-55%). The second-largest number of voxel-selectivity  
17 is face selectivity (1- 40%). Place-selective fROIs (Fig. 5, bottom left) show a large proportion of  
18 voxels with their preferred place selectivity (*purple*, 77-82%), followed by up to 21% body-  
19 selective voxel. Character-selective ROIs (Fig 5., bottom right) on the other hand contain 41 - 52%  
20 character-selective voxel, followed by up to 38% body-selective voxels.

21

22

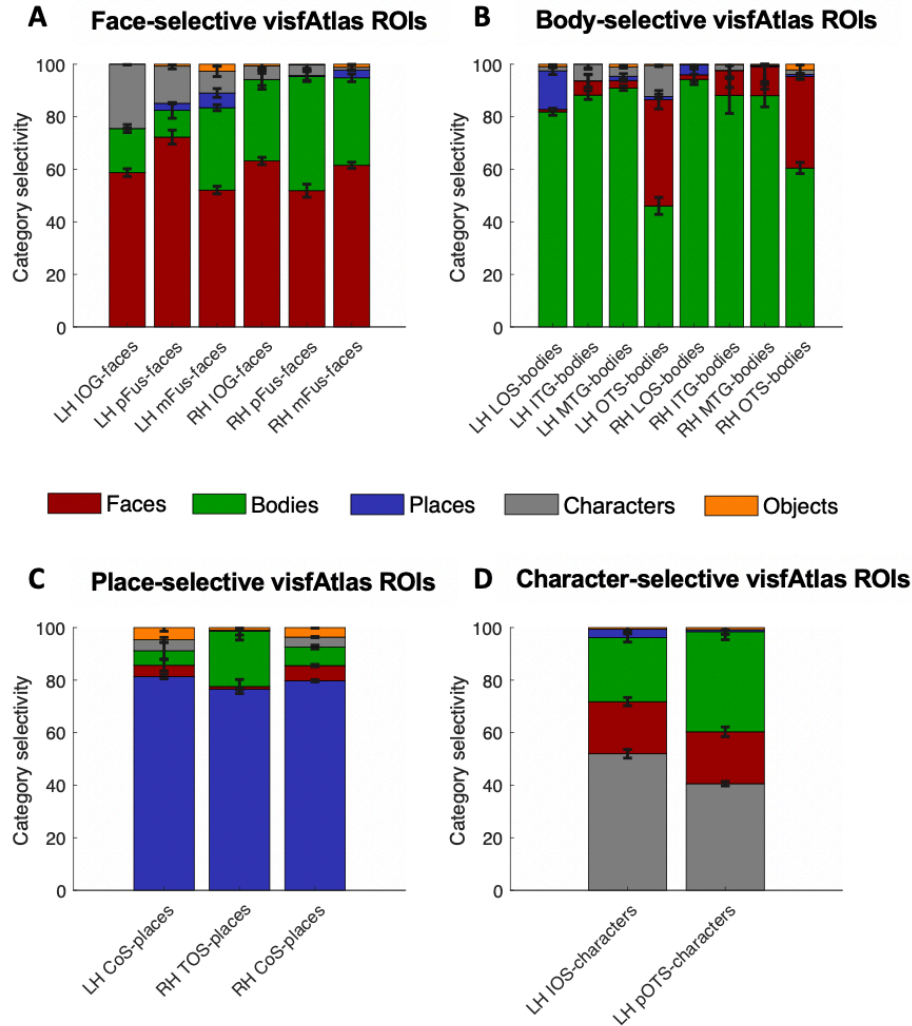

1  
 2 **Figure 5. Selectivity analysis for category-selective fROIs using a leave-subject-out cross-validation procedure.**  
 3 For each major category - faces, bodies, places, characters – proportions of category selectivity are displayed with  
 4 each region’s preferred category as the bottom bar of each stacked bar graph. *Error bars*: Selectivity estimate across  
 5 all left-out subjects.

6  
 7 *Similarities between previously published atlas areas and our visfAtlas*

8 In order to establish the correspondence of our probabilistic functional atlas to other atlases,  
 9 we made quantitative comparisons to existing atlases of one or multiple regions localized with  
 10 comparable stimuli. As retinotopic atlases are frequently used to define early visual cortices in  
 11 new subjects, we wanted to compare our retinotopic areas v1-v3 dorsal and ventral to a group atlas

1 of retinotopic visual areas aligned to the *fsaverage brain* by Wang et al. (2014). To assess the  
2 correspondence between the two atlases we computed the dice coefficient (see Methods for details)  
3 between the existing group atlas and our *visfAtlas* region for each region separately. Qualitatively,  
4 *v1d* and *v1v* from both atlases show a high degree of overlap and correspondence decreases when  
5 moving to the dorsal and ventral *v2* and *v3* regions (Fig. 6A). In addition, there is a shift in the  
6 right hemisphere region location that is not present in the left hemisphere. This observation is  
7 confirmed with high dice coefficients for *v1d* and *v1v* in the left hemisphere (0.81 and 0.89,  
8 respectively) and lower dice coefficients in the right hemisphere (*v1d*: 0.70, *v1v*: 0.72). Both  
9 dorsally and ventrally, the difference between hemispheres becomes more prominent (LH: *v2d*:  
10 0.61, *v3d*: 0.53, *v2v*: 0.89, *v3v*: 0.59; RH: *v2d*: 0.34, *v3d*: 0.05, *v2v*: 0.54, *v3v*: 0.31).

11 In a similar fashion to the retinotopic regions, we compared a category-selective region -  
12 the CoS-places *fROI* - to a published probabilistic version by Weiner et al. (2018) which used the  
13 same localizer for their study. Both atlases display a high correspondence, with a higher dice  
14 coefficient in the left hemisphere than in the right hemisphere (LH: 0.85, RH: 0.61). On lateral  
15 occipito-temporal cortex we compared a recently published motion selective group area of  
16 *hMT+* that has been defined using data from 509 adults. As their group *fROI* was not bound by  
17 body-selective regions with a maximum probability map (MPM) as ours, we chose to compare  
18 their group *hMT+* map with our probabilistic *hMT+* that is also not restricted with body-selective  
19 areas. In the left hemisphere the dice coefficient is 0.59, and 0.69 in the right hemisphere and  
20 therewith showing a greater consistency in the right hemisphere.

21



**A visfAtlas retinotopic areas and atlas by Wang et al. (2014)**

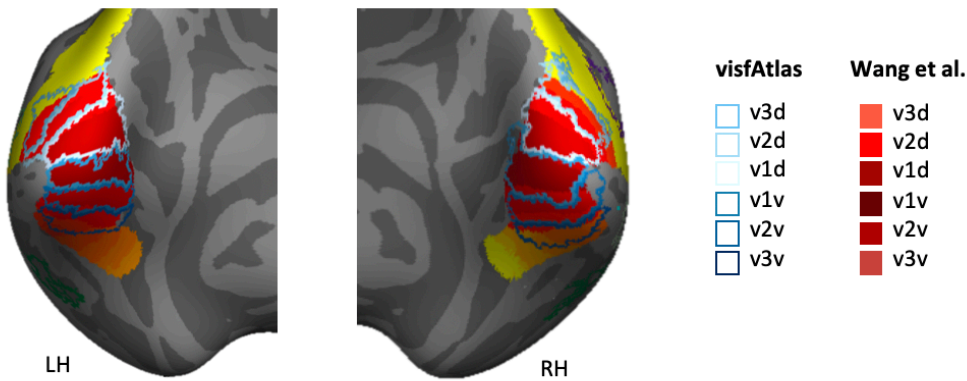

**B visfAtlas CoS-places and CoS-places by Weiner et al. (2018)**

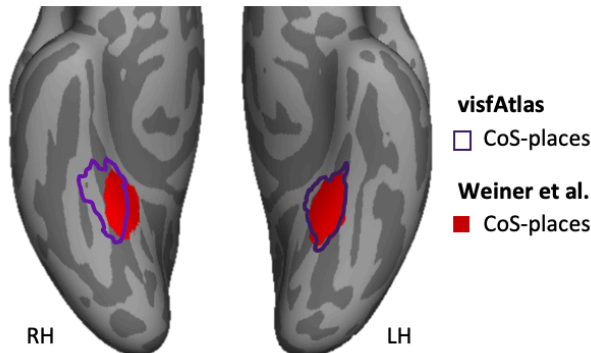

**C visfAtlas hMT and probabilistic hMT by Huang et al. (2019)**

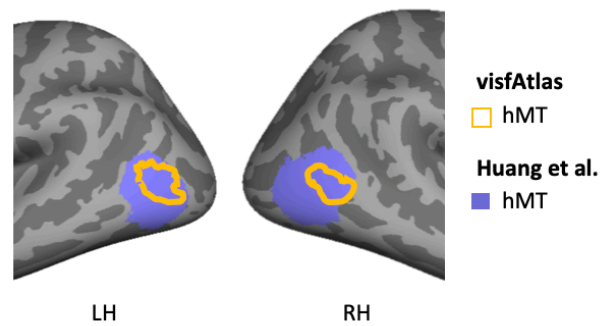

1  
2 **Figure 6. Similarities across different probabilistic atlases and the visfAtlas.** Superposition of our visfAtlas onto  
3 three existing probabilistic atlases. (A) A comparison of V1-V3 dorsal and ventral of the retinotopic atlas published  
4 by Wang et al (2014) and our respective visfAtlas regions. Regions are presented on a medial-occipital view of the  
5 fsaverage group brain. (B) CoS-places as published by Weiner et al (2018) and visfAtlas CoS-places, localized using  
6 the same stimuli and visualized using a ventral view of the fsaverage brain. (C) A probabilistic ROI of motion-selective  
7 hMT+published by Huang et al. (2019) and our probabilistic ROI, noteworthy, not the MPM as it is not restricted by  
8 surrounding body-selective regions, of hMT+shown in a lateral view of the fsaverage brain. *Solid ROIs*: published  
9 atlases by other groups; *outlined ROIs*: our visfAtlas ROIs. LH: left hemisphere; RH: right hemisphere.

10

11

## 1 DISCUSSION

2 We generated a cross-validated functional parcellation of occipito-temporal visual cortex,  
3 including early-visual cortex retinotopic regions as well as category-selective regions.  
4 Additionally, we estimated predictability and selectivity for left-out subjects. We show that cortex-  
5 based alignment (CBA) outperforms nonlinear-volumetric alignment (NVA) in most cases and  
6 that each probabilistic functional region maintains between 40% and 94% of its own category's  
7 response in a left-out subject (Fig. 5), suggesting a higher precision of our surface-based atlas  
8 while also demonstrating its utility in volumetric MNI space. To our knowledge this is the first  
9 extensive cross-validated probabilistic atlas of category-selective regions in ventral temporal  
10 cortex besides CoS-places published by Weiner et al. (2018). We make this functional atlas of  
11 occipito-temporal cortex available in surface as well as volume space, together with a new  
12 BrainVoyager surface average that can be used for any surface-analysis  
13 (<https://share.brainvoyager.com/index.php/s/m2E9oZTGWwXodRk>).

14

### 15 *Superior consistency of functional group regions after cortex-based alignment: Implications*

16 Spatial consistency in both retinotopic as well as category-selective regions was higher after  
17 CBA as compared to NVA (Fig. 3). The superior performance of CBA is in agreement with  
18 previous findings of retinotopic regions (Wang et al., 2014) as well as cytoarchitectonic regions  
19 and their relationship to functional parcellations of the ventral visual stream (Rosenke et al., 2017a,  
20 2017b). The greater consistency of functional parcellations highlights a strong coupling between  
21 macroanatomical landmarks and functional regions, which has indeed been observed in early  
22 visual cortex between V1 and the calcarine sulcus (Hinds et al., 2008), in intermediate visual areas  
23 between V3A as well as human V4 and the transverse occipital and collateral sulcus, respectively  
24 (Nasr et al., 2011; Tootell et al., 1997; Witthoft et al., 2014), as well as in lateral visual cortex for  
25 motion-selective hMT+ and two underlying sulci (Dumoulin et al., 2000; Weiner and Grill-  
26 Spector, 2011). Similarly, various category-selective regions in ventral temporal cortex have  
27 shown a macroanatomy-function coupling (Grill-Spector and Weiner, 2014; Weiner et al., 2018,  
28 2014; Weiner and Grill-Spector, 2013).

1 Historically, functional regions were assumed to have a greater variability (a) in higher-  
2 visual cortices, as well as (b) a weak co-occurrence with macroanatomical landmarks. However,  
3 as pointed out using various anatomical-functional correspondences in the paragraph above and  
4 supported by higher functional consistency after microanatomical alignment in recent work (Wang  
5 et al., 2014), this does not hold true. In accordance with this, our leave-one-out cross-validation  
6 procedure shows that five regions sensitive to visual stimulation of specific categories (pFus-faces,  
7 LOS-bodies, ITG-bodies, CoS-places, motion-selective hMT+, Fig. 3) have a similar amount of  
8 overlap as retinotopic regions outside of V1. Other functional regions, however, show more  
9 variability (e.g. mFus-faces, pOTS-characters, MTG-bodies, Fig. 3, see also Frost and Goebel,  
10 2012). This highlights how other factors besides location in the cortical hierarchy play a role in  
11 the consistency of functional regions, and we discuss a few possibilities here: First, it may be a  
12 factor of region size, as even though the dice coefficient takes overall region size into account,  
13 region size still correlates with dice coefficient results (Rosenke et al., 2017a). Future efforts  
14 should include the exploration and development of measures that are independent of region size.  
15 Second, functional variability can in part be influenced by the functional-macroanatomical  
16 consistency across subjects. For example, the anterior tip of a macroanatomical landmark, the mid-  
17 fusiform sulcus (MFS), has been shown to be a more stable predictor of functional regions than its  
18 length or posterior section (Weiner et al., 2014). This indicates that not all anatomical structures  
19 that get aligned during CBA have to have an equally strong relationship to a functional region of  
20 interest. Third, the quality of the macroanatomical alignment across subjects may vary across  
21 cortical locations due to greater anatomical variability across individuals. While results of cortex-  
22 based alignment are often seen as precise and superior to other methods, it is easily overlooked  
23 that functional consistency is often evaluated under the assumption that anatomical alignment is  
24 perfect. However, Frost and Goebel (2012, 2013) showed that while CBA outperforms non-aligned  
25 and volumetrically-aligned anatomical landmarks, macroanatomical landmarks still show a degree  
26 of variability unique to each landmark. One can imagine that for smaller landmarks with greater  
27 variability, e.g. the partially fragmented occipito-temporal sulcus (OTS), CBA will be less able to  
28 align landmarks compared to highly consistent anatomical structures. A future, more advanced,  
29 alignment scheme could take such emerging knowledge into account by using non-homogeneous  
30 regional weights for curvature landmarks.

1

2 *Structures defined in maximum probability map are category specific*

3       As the main purpose of a functional atlas is to allow generalization to new individuals,  
4 confirmation and validation of the functional selectivity of the delineated areas is crucial. We used  
5 a leave-one-out approach to quantify the generalizability of our maximum probability map, and  
6 demonstrate that voxels within a region-of-interest are highly selective to the category that the ROI  
7 is known to respond to. This is an important confirmation of one of the underlying assumptions of  
8 functional atlases: a (macro-)anatomical correspondence to function (Grill-Spector and Weiner,  
9 2014; Weiner et al., 2018, 2014; Weiner and Grill-Spector, 2013), which can be utilized when  
10 aligning a new subject's macroanatomy to the macroanatomy an existing functional atlas is based  
11 on.

12       As can be observed in Figure 5, for each category-selective region, the largest proportion  
13 of voxel selectivity is that of the own category with the lowest overall proportion for word-  
14 selective regions (Fig. 5, bottom right). Furthermore, the highest proportion of own-category-  
15 selectivity can be found in lateral body-selective regions (Fig. 5, top right). One possible  
16 explanation for the variability in this location is the proximity to other category selective regions.  
17 For example, when comparing face-and body selective areas in ventral temporal cortex (see Fig.  
18 4 A for details), they are very close together as well as adjacent, when compared to body-selective  
19 regions in lateral occipital cortex. This close proximity increases the likelihood of overlapping  
20 functional specificity of atlas boundaries that may or may not align precisely with a new subject's  
21 functional selectivity. Next, areas in ventral temporal cortex tend to be smaller. Due to the nature  
22 of our selectivity measure, dividing the number of category-preferring voxel within a region by  
23 the total number is more drastically influenced by single voxels in smaller regions as compared to  
24 larger regions.

25

26 *Consistent functional loci across different atlases*

1           Comparing our visfAtlas regions to existing atlases can highlight the effects of (1) different  
2 localizer stimuli (e.g. Fig 6 A & C), as well as (2) effects of the number of subjects included in a  
3 group map (Fig. 6). With retinotopy being one of the fundamental organizational principles of  
4 visual cortex (Arcaro et al., 2009; Brewer et al., 2005; Dumoulin and Wandell, 2008; Orban et al.,  
5 2004; Sereno et al., 1995) we aimed at comparing our retinotopic regions V1-V3 dorsal and ventral  
6 to an existing atlas published by Wang et al. (2014). Interestingly, V1d and V1v show a high  
7 degree of overlap across both atlases (Fig. 6A), especially in the left hemisphere. Right hemisphere  
8 V1 of the visfAtlas extends more dorsally, consequently shifting other right hemisphere retinotopic  
9 regions as compared to the atlas by Wang et al. (2014). In addition, we compared our visfAtlas  
10 CoS-places to a CoS-places published by Weiner et al. (2018), who used the same localizer for  
11 their atlas as well as the same statistical threshold for defining CoS-places in each subject ( $t=3$ ).  
12 Interestingly, also here the probabilistic ROIs differ more in the right than left hemisphere (Fig.  
13 6B). However, we found no differences across hemispheres for region size as well as predictability,  
14 providing evidence against our assumptions. The fact that the right hemisphere showed more  
15 differences across atlases could be due to a variety of factors.

16           Next to retinotopic regions of early visual cortex, we also compared our motion-selective  
17 hMT+ to a recently published probabilistic atlas, based on a large-scale dataset of >500  
18 participants (Huang et al., 2019). In this work, a visual localizer (moving concentric rings which  
19 expanded or contracted) different from ours (circular block of dots moving in several directions)  
20 was used and might explain the slightly different loci of the hMT+ probability map presented here.  
21 Our hMT+ localizer may include less medial superior temporal (MST) area due to the differences.  
22 However, the probabilistic maps are difficult to compare due to the large difference in sample size  
23 between their and our study. The region published by Huang et al. (2019) has a surface area more  
24 than double from ours, highlighting the inter-subject variability in hMT+ location.

25           Ultimately, besides the differences across atlas regions, each of the three atlases compared  
26 with our visfAtlas defines cortical areas with the same functional locus, highlighting the utility of  
27 functional atlases for future neuroimaging studies.

28

## 1 *Conclusion and future uses*

2           To this date, no probabilistic atlas has been published which contains such an extensive set  
3 of functional regions in occipito-temporal cortex. The present study shows that most of the  
4 category-selective regions can indeed be found in new subjects at predicted locations with  
5 functional magnetic resonance imaging. Additionally, these regions show high specificity towards  
6 their respective categories. Finally, we showed that these selectivity results are generalizable by  
7 means of a leave-one-out analysis. Future studies should aim at extending this atlas by including  
8 dynamic stimuli in addition to static, since those are more suitable for ventral temporal correct and  
9 further category-selective regions in lateral occipital cortex could be delineated using dynamic  
10 stimuli (Beauchamp et al., 2003; Grossman and Blake, 2002; Pitcher et al., 2011; Puce et al., 1996).

11           The functional atlas of occipito-temporal cortex in both, surface and volume space, is  
12 available in most commonly used imaging data formats  
13 (<https://share.brainvoyager.com/index.php/s/m2E9oZTGWwXodRk>). Our atlas may prove  
14 especially useful for (a) predicting a region of interest when no localizer data is available, saving  
15 scanning time and expenses or (b) for comparison's across modalities as patient populations as for  
16 example patients who are brain lesioned (Barton, 2008; de Heering and Rossion, 2015; Gilaie-  
17 Dotan et al., 2009; Schiltz and Rossion, 2006; Sorger et al., 2007; Steeves et al., 2006) or  
18 congenitally blind (Bedny et al., 2011; Mahon et al., 2009; Striem-Amit et al., 2012; van den Hurk  
19 et al., 2017).

20

## 21 **Acknowledgements**

22 We would like to thank Martin Frost for advice with the experimental design, Kevin S. Weiner for  
23 feedback on individual definitions of regions-of-interest and Kevin S. Weiner and Kalanit Grill-  
24 Spector for analysis suggestions. RG was supported by the European FET Flagship project  
25 'Human Brain Project' FP7-ICT-2013-FET-F/604102 Grant Agreements, No. 7202070 (SGA1)  
26 and No. 785907 (SGA2).

## 1 **References**

- 2 Amunts, K., Malikovic, A., Mohlberg, H., Schormann, T., Zilles, K., 2000. Brodmann's areas 17  
3 and 18 brought into stereotaxic space - where and how variable? . *Neuroimage* 11, 66–84.
- 4 Arcaro, M.J., McMains, S.A., Singer, B.D., Kastner, S., 2009. Retinotopic organization of  
5 human ventral visual cortex. *J Neurosci* 29, 10638–10652. <https://doi.org/29/34/10638>  
6 [pii]r10.1523/JNEUROSCI.2807-09.2009
- 7 Barton, J.J.S., 2008. Structure and function in acquired prosopagnosia: lessons from a series of  
8 10 patients with brain damage. *J. Neuropsychol.* 2, 197.  
9 <https://doi.org/10.1348/174866407X214172>
- 10 Beauchamp, M.S., Lee, K.E., Haxby, J. V., Martin, A., 2003. fMRI Responses to Video and  
11 Point-Light Displays of Moving Humans and Manipulable Objects. *J. Cogn. Neurosci.* 15,  
12 991–1001. <https://doi.org/10.1162/089892903770007380>
- 13 Bedny, M., Pascual-Leone, A., Dodell-Feder, D., Fedorenko, E., Saxe, R., 2011. Language  
14 processing in the occipital cortex of congenitally blind adults. *Proc. Natl. Acad. Sci. U. S.*  
15 *A.* 108, 4429–34. <https://doi.org/10.1073/pnas.1014818108>
- 16 Brewer, A.A., Liu, J., Wade, A.R., Wandell, B.A., 2005. Visual field maps and stimulus  
17 selectivity in human ventral occipital cortex 8, 1102–1109. <https://doi.org/10.1038/nn1507>
- 18 Caspers, J., Zilles, K., Eickhoff, S.B., Schleicher, A., Mohlberg, H., Amunts, K., 2013.  
19 Cytoarchitectonical analysis and probabilistic mapping of two extrastriate areas of the  
20 human posterior fusiform gyrus. *Brain Struct Funct* 218, 511–526.  
21 <https://doi.org/10.1007/s00429-012-0411-8>
- 22 de Heering, A., Rossion, B., 2015. Rapid categorization of natural face images in the infant right  
23 hemisphere. *Elife* 4, 1–14. <https://doi.org/10.7554/elife.06564>
- 24 DeYoe, E. a, Carman, G.J., Bandettini, P., Glickman, S., Wieser, J., Cox, R., Miller, D., Neitz, J.,  
25 1996. Mapping striate and extrastriate visual areas in human cerebral cortex. *Proc. Natl.*  
26 *Acad. Sci. U. S. A.* 93, 2382–2386. <https://doi.org/10.1073/pnas.93.6.2382>
- 27 Downing, P.E., Downing, P.E., Jiang, Y., Jiang, Y., Shuman, M., Shuman, M., Kanwisher, N.,  
28 Kanwisher, N., 2001. A cortical area selective for visual processing of the human body.  
29 *Science* 293, 2470–3. <https://doi.org/10.1126/science.1063414>

- 1 Dumoulin, S.O., Bittar, R.G., Kabani, N.J., Baker, C.L., Le Goualher, G., Bruce Pike, G., Evans,  
2 a C., 2000. A new anatomical landmark for reliable identification of human area V5/MT: a  
3 quantitative analysis of sulcal patterning. *Cereb. Cortex* 10, 454–463.  
4 <https://doi.org/10.1093/cercor/10.5.454>
- 5 Dumoulin, S.O., Wandell, B.A., 2008. Population receptive field estimates in human visual  
6 cortex. *Neuroimage* 39, 647–660. <https://doi.org/10.1016/j.neuroimage.2007.09.034>
- 7 Eickhoff, S.B., Stephan, K.E., Mohlberg, H., Grefkes, C., Fink, G.R., Amunts, K., Zilles, K.,  
8 2005. A new SPM toolbox for combining probabilistic cytoarchitectonic maps and  
9 functional imaging data. *Neuroimage* 25, 1325–1335.  
10 <https://doi.org/10.1016/j.neuroimage.2004.12.034>
- 11 El Gazzar, A., Cerliani, L., Van Wingen, G., Thomas, R.M., 2019. Simple 1-D Convolutional  
12 Networks for Resting-State fMRI Based Classification in Autism, in: *Proceedings of the*  
13 *International Joint Conference on Neural Networks*. Institute of Electrical and Electronics  
14 Engineers Inc. <https://doi.org/10.1109/IJCNN.2019.8852002>
- 15 Emmerling, T.C., Zimmermann, J., Sorger, B., Frost, M.A., Goebel, R., 2016. Decoding the  
16 direction of imagined visual motion using 7 T ultra-high field fMRI. *Neuroimage* 125, 61–  
17 73. <https://doi.org/10.1016/j.neuroimage.2015.10.022>
- 18 Engel, S.A., Glover, G.H., Wandell, B.A., 1997. Retinotopic organization in human visual cortex  
19 and the spatial precision of functional MRI. *Cereb Cortex* 7, 181–192.
- 20 Epstein, R., Kanwisher, N., 1998. A cortical representation of the local visual environment.  
21 *Nature* 392, 598–601. <https://doi.org/10.1038/33402>
- 22 Frost, M.A., Goebel, R., 2013. Functionally informed cortex based alignment: an integrated  
23 approach for whole-cortex macro-anatomical and ROI-based functional alignment.  
24 *Neuroimage* 83, 1002–1010. <https://doi.org/10.1016/j.neuroimage.2013.07.056>
- 25 Frost, M.A., Goebel, R., 2012. Measuring structural-functional correspondence: spatial  
26 variability of specialised brain regions after macro-anatomical alignment. *Neuroimage* 59,  
27 1369–1381. <https://doi.org/10.1016/j.neuroimage.2011.08.035>
- 28 Gilaie-Dotan, S., Perry, A., Bonneh, Y., Malach, R., Bentin, S., 2009. Seeing with profoundly  
29 deactivated mid-level visual areas: Non-hierarchical functioning in the human visual cortex.



- 1 Cereb. Cortex 19, 1687–1703. <https://doi.org/10.1093/cercor/bhn205>
- 2 Glasser, M.F., Coalson, T.S., Robinson, E.C., Hacker, C.D., Harwell, J., Yacoub, E., 2016. A  
3 multi-modal parcellation of human cerebral cortex. *Nat. Publ. Gr.* 536, 171–178.  
4 <https://doi.org/10.1038/nature18933>
- 5 Goebel, R., Esposito, F., Formisano, E., 2006. Analysis of functional image analysis contest  
6 (FIAC) data with brainvoyager QX: From single-subject to cortically aligned group general  
7 linear model analysis and self-organizing group independent component analysis. *Hum*  
8 *Brain Mapp* 27, 392–401. <https://doi.org/10.1002/hbm.20249>
- 9 Goodale, M.A., Milner, A.D., Jakobson, L.S., Carey, D.P., 1991. A neurological dissociation  
10 between perceiving objects and grasping them. *Nature*. <https://doi.org/10.1038/349154a0>
- 11 Grill-Spector, K., Weiner, K.S., 2014. The functional architecture of the ventral temporal cortex  
12 and its role in categorization. *Nat. Rev. Neurosci.* 15, 536–548.  
13 <https://doi.org/10.1038/nrn3747>
- 14 Grossman, E.D., Blake, R., 2002. Brain areas active during visual perception of biological  
15 motion. *Neuron* 35, 1167–1175. [https://doi.org/10.1016/S0896-6273\(02\)00897-8](https://doi.org/10.1016/S0896-6273(02)00897-8)
- 16 Hasson, U., Harel, M., Levy, I., Malach, R., 2003. Large-scale mirror-symmetry organization of  
17 human occipito-temporal object areas. *Neuron* 37, 1027–1041.  
18 [https://doi.org/10.1016/S0896-6273\(03\)00144-2](https://doi.org/10.1016/S0896-6273(03)00144-2)
- 19 Hinds, O.P., Rajendran, N., Polimeni, J.R., Augustinack, J.C., Wiggins, G., Wald, L.L., Diana  
20 Rosas, H., Potthast, A., Schwartz, E.L., Fischl, B., 2008. Accurate prediction of V1 location  
21 from cortical folds in a surface coordinate system. *Neuroimage* 39, 1585–1599.  
22 <https://doi.org/10.1016/j.neuroimage.2007.10.033>
- 23 Huang, T., Chen, X., Jiang, J., Zhen, Z., Liu, J., 2019. A probabilistic atlas of the human motion  
24 complex built from large-scale functional localizer data. *Hum. Brain Mapp.* 40, hbm.24610.  
25 <https://doi.org/10.1002/hbm.24610>
- 26 Huk, A.C., Dougherty, R.F., Heeger, D.J., 2002. Retinotopy and functional subdivision of human  
27 areas MT and MST. *J. Neurosci.* 22, 7195–205. <https://doi.org/20026661>
- 28 Kanwisher, N.G., McDermott, J., Chun, M.M., 1997. The Fusiform Face Area: A Module in  
29 Human Extrastriate Cortex Specialized for Face Perception. *J. Neurosci.* 17, 4302–4311.

- 1 Kautzky, A., Seiger, R., Hahn, A., Fischer, P., Krampla, W., Kasper, S., Kovacs, G.G.,  
2 Lanzenberger, R., 2018. Prediction of Autopsy Verified Neuropathological Change of  
3 Alzheimer's Disease Using Machine Learning and MRI. *Front. Aging Neurosci.* 10.  
4 <https://doi.org/10.3389/fnagi.2018.00406>
- 5 Kujovic, M., Zilles, K., Malikovic, A., Schleicher, A., Mohlberg, H., Rottschy, C., Eickhoff,  
6 S.B., Amunts, K., 2013. Cytoarchitectonic mapping of the human dorsal extrastriate cortex.  
7 *Brain Struct Funct* 218, 157–172. <https://doi.org/10.1007/s00429-012-0390-9>
- 8 Lorenz, S., Weiner, K.S., Caspers, J., Mohlberg, H., Schleicher, A., Bludau, S., Eickhoff, S.B.,  
9 Grill-Spector, K., Zilles, K., Amunts, K., 2015. Two New Cytoarchitectonic Areas on the  
10 Human Mid-Fusiform Gyrus. *Cereb Cortex* 1–13. <https://doi.org/10.1093/cercor/bhv225>
- 11 Mahon, B.Z., Anzellotti, S., Schwarzbach, J., Zampini, M., Caramazza, A., 2009. Category-  
12 Specific Organization in the Human Brain Does Not Require Visual Experience. *Neuron* 63,  
13 397–405. <https://doi.org/10.1016/j.neuron.2009.07.012>
- 14 Mishkin, M., Ungerleider, L.G., Macko, K. a, 1983. Object vision and spatial vision: Two central  
15 pathways. *Trends Neurosci.* 6, 414–417. [https://doi.org/10.1016/0166-2236\(83\)90190-](https://doi.org/10.1016/0166-2236(83)90190-X)  
16 X
- 17 Mumford, J.A., Turner, B.O., Ashby, F.G., Poldrack, R.A., 2012. Deconvolving BOLD  
18 activation in event-related designs for multivoxel pattern classification analyses.  
19 *Neuroimage* 59, 2636–2643. <https://doi.org/10.1016/j.neuroimage.2009.07.012>
- 20 Nasr, S., Liu, N., Devaney, K.J., Yue, X., Rajimehr, R., Ungerleider, L.G., Tootell, R.B.H.,  
21 2011. Scene-selective cortical regions in human and nonhuman primates. *J. Neurosci.* 31,  
22 13771–13785. <https://doi.org/10.1523/JNEUROSCI.2792-11.2011>
- 23 Nieto-Castañón, A., Fedorenko, E., 2012. Subject-specific functional localizers increase  
24 sensitivity and functional resolution of multi-subject analyses. *Neuroimage* 63, 1646–1669.  
25 <https://doi.org/10.1016/j.neuroimage.2012.06.065>
- 26 Orban, G.A., Van Essen, D., Vanduffel, W., 2004. Comparative mapping of higher visual areas  
27 in monkeys and humans. *Trends Cogn. Sci.* 8, 315–324.  
28 <https://doi.org/10.1016/j.tics.2004.05.009>
- 29 Peelen, M. V., Glaser, B., Vuilleumier, P., Eliez, S., 2009. Differential development of

- 1 selectivity for faces and bodies in the fusiform gyrus. *Dev. Sci.* 12, 16–25.  
2 <https://doi.org/10.1111/j.1467-7687.2009.00916.x>
- 3 Pitcher, D., Dilks, D.D., Saxe, R.R., Triantafyllou, C., Kanwisher, N., 2011. Differential  
4 selectivity for dynamic versus static information in face-selective cortical regions.  
5 *Neuroimage* 56, 2356–2363. <https://doi.org/10.1016/j.neuroimage.2011.03.067>
- 6 Puce, A., Allison, T., Asgari, M., Gore, J.C., McCarthy, G., 1996. Differential sensitivity of  
7 human visual cortex to faces, letterstrings, and textures: A functional magnetic resonance  
8 imaging study. *J. Neurosci.* 16, 5205–5215. [https://doi.org/10.1523/jneurosci.16-16-](https://doi.org/10.1523/jneurosci.16-16-05205.1996)  
9 [05205.1996](https://doi.org/10.1523/jneurosci.16-16-05205.1996)
- 10 Rondina, J.M., Ferreira, L.K., de Souza Duran, F.L., Kubo, R., Ono, C.R., Leite, C.C., Smid, J.,  
11 Nittrini, R., Buchpiguel, C.A., Busatto, G.F., 2018. Selecting the most relevant brain regions  
12 to discriminate Alzheimer’s disease patients from healthy controls using multiple kernel  
13 learning: A comparison across functional and structural imaging modalities and atlases.  
14 *NeuroImage Clin.* 17, 628–641. <https://doi.org/10.1016/j.nicl.2017.10.026>
- 15 Rosenke, M., Weiner, K.S., Barnett, M.A., Zilles, K., Amunts, K., Goebel, R., Grill-Spector, K.,  
16 2017a. A cross-validated cytoarchitectonic atlas of the human ventral visual stream.  
17 *Neuroimage* 1–14. <https://doi.org/10.1016/j.neuroimage.2017.02.040>
- 18 Rosenke, M., Weiner, K.S., Barnett, M.A., Zilles, K., Amunts, K., Goebel, R., Grill-Spector, K.,  
19 2017b. Data on a cytoarchitectonic brain atlas: effects of brain template and a comparison to  
20 a multimodal atlas. *Data Br.* 12, 327–332. <https://doi.org/10.1016/j.dib.2017.04.007>
- 21 Rottschy, C., Eickhoff, S.B., Schleicher, A., Mohlberg, H., Kujovic, M., Zilles, K., Amunts, K.,  
22 2007. Ventral visual cortex in humans: Cytoarchitectonic mapping of two extrastriate areas.  
23 *Hum. Brain Mapp.* 28, 1045–1059.
- 24 Saxe, R., Brett, M., Kanwisher, N., 2006. Divide and conquer: a defense of functional localizers.  
25 *Neuroimage* 30, 1088–1089. <https://doi.org/10.1016/j.neuroimage.2005.12.062>
- 26 Schiltz, C., Rossion, B., 2006. Faces are represented holistically in the human occipito-temporal  
27 cortex. *Neuroimage* 32, 1385–1394. <https://doi.org/10.1016/j.neuroimage.2006.05.037>
- 28 Schwarzlose, R.F., Baker, C.I., Kanwisher, N., 2005. Separate Face and Body Selectivity on the  
29 Fusiform Gyrus. *J. Neurosci.* 25, 11055–11059. [https://doi.org/10.1523/JNEUROSCI.2621-](https://doi.org/10.1523/JNEUROSCI.2621-05.2005)

- 1           05.2005
- 2   Senden, M., Reithler, J., Gijzen, S., Goebel, R., 2014. Evaluating Population Receptive Field  
3       Estimation Frameworks in Terms of Robustness and Reproducibility. *PLoS One* 9,  
4       e114054. <https://doi.org/10.1371/journal.pone.0114054>
- 5   Sereno, M.I., Dale, a M., Reppas, J.B., Kwong, K.K., Belliveau, J.W., Brady, T.J., Rosen, B.R.,  
6       Tootell, R.B.H., Series, N., May, N., 1995. Borders of Multiple Visual Areas in Humans  
7       Revealed by Functional Magnetic Resonance Imaging Borders of Multiple Visual Areas in  
8       Humans Revealed by Functional Magnetic Resonance Imaging 268, 889–893.
- 9   Sorger, B., Goebel, R., Schiltz, C., Rossion, B., 2007. Understanding the functional  
10       neuroanatomy of acquired prosopagnosia. *Neuroimage* 35, 836–852.  
11       <https://doi.org/10.1016/j.neuroimage.2006.09.051>
- 12   Steeves, J.K.E., Culham, J.C., Duchaine, B.C., Pratesi, C.C., Valyear, K.F., Schindler, I.,  
13       Humphrey, G.K., Milner, A.D., Goodale, M.A., 2006. The fusiform face area is not  
14       sufficient for face recognition: Evidence from a patient with dense prosopagnosia and no  
15       occipital face area. *Neuropsychologia* 44, 594–609.  
16       <https://doi.org/10.1016/j.neuropsychologia.2005.06.013>
- 17   Stigliani, A., Weiner, K.S., Grill-Spector, K., 2015. Temporal Processing Capacity in High-Level  
18       Visual Cortex Is Domain Specific. *J. Neurosci.* 35, 12412–12424.  
19       <https://doi.org/10.1523/JNEUROSCI.4822-14.2015>
- 20   Striem-Amit, E., Dakwar, O., Reich, L., Amedi, A., 2012. The large-scale organization of  
21       “visual” streams emerges without visual experience. *Cereb. Cortex* 22, 1698–1709.  
22       <https://doi.org/10.1093/cercor/bhr253>
- 23   Susilo, T., Yang, H., Potter, Z., Robbins, R., Duchaine, B., 2015. Normal Body Perception  
24       despite the Loss of Right Fusiform Gyrus. *J. Cogn. Neurosci.* 27, 614–622.
- 25   Talairach, J., Tournoux, P., 1988. *Co-planar Stereotaxic Atlas of the Human Brain.*
- 26   Tootell, R.B., Mendola, J.D., Hadjikhani, N.K., Ledden, P.J., Liu, A.K., Reppas, J.B., Sereno,  
27       M.I., Dale, A.M., 1997. Functional analysis of V3A and related areas in human visual  
28       cortex. *J. Neurosci.* 17, 7060–78.
- 29   Vakli, P., Deák-Meszlényi, R.J., Hermann, P., Vidnyánszky, Z., 2018. Transfer learning

- 1 improves resting-state functional connectivity pattern analysis using convolutional neural  
2 networks. *Gigascience* 7. <https://doi.org/10.1093/gigascience/giy130>
- 3 van den Hurk, J., Van Baelen, M., Op de Beeck, H.P., 2017. Development of visual category  
4 selectivity in ventral visual cortex does not require visual experience. *Proc. Natl. Acad. Sci.*  
5 114, E4501–E4510. <https://doi.org/10.1073/pnas.1612862114>
- 6 Wandell, B.A., Brewer, A.A., Dougherty, R.F., 2005. Visual field map clusters in human cortex.  
7 *Philos. Trans. R. Soc. Lond. B. Biol. Sci.* 360, 693–707.  
8 <https://doi.org/10.1098/rstb.2005.1628>
- 9 Wandell, B.A., Winawer, J., 2011. Imaging retinotopic maps in the human brain. *Vision Res.* 51,  
10 718–737.
- 11 Wang, L., Mruczek, R.E.B., Arcaro, M.J., Kastner, S., 2014. Probabilistic Maps of Visual  
12 Topography in Human Cortex. *Cereb. Cortex* 1–21.
- 13 Weiner, K.S., Barnett, M.A., Witthoft, N., Golarai, G., Stigliani, A., Kay, K.N., Gomez, J., Natu,  
14 V.S., Amunts, K., Zilles, K., Grill-Spector, K., 2018. Defining the most probable location of  
15 the parahippocampal place area using cortex-based alignment and cross-validation.  
16 *Neuroimage* 170, 373–384. <https://doi.org/10.1016/j.neuroimage.2017.04.040>
- 17 Weiner, K.S., Golarai, G., Caspers, J., Chuapoco, M.R., Mohlberg, H., Zilles, K., Amunts, K.,  
18 Grill-Spector, K., 2014. The mid-fusiform sulcus: a landmark identifying both  
19 cytoarchitectonic and functional divisions of human ventral temporal cortex. *Neuroimage*  
20 84, 453–465. <https://doi.org/10.1016/j.neuroimage.2013.08.068>
- 21 Weiner, K.S., Grill-Spector, K., 2013. Neural representations of faces and limbs neighbor in  
22 human high-level visual cortex: Evidence for a new organization principle. *Psychol. Res.*  
23 77, 74–97. <https://doi.org/10.1007/s00426-011-0392-x>
- 24 Weiner, K.S., Grill-Spector, K., 2011. Not one extrastriate body area: Using anatomical  
25 landmarks, hMT+, and visual field maps to parcellate limb-selective activations in human  
26 lateral occipitotemporal cortex. *Neuroimage* 56, 2183–2199.  
27 <https://doi.org/10.1016/j.neuroimage.2011.03.041>
- 28 Witthoft, N., Nguyen, M., Golarai, G., LaRocque, K.F., Liberman, A., Smith, M.E., Grill-  
29 Spector, K., 2014. Where is human V4? Predicting the location of hV4 and VO1 from

- 1 cortical folding. *Cereb. Cortex* 24, 2401–2408. <https://doi.org/10.1093/cercor/bht092>
- 2 Zeki, S., Kennard, C., Watson, J.D.G., Lueck, C.J., Frackowiak, R.S.J., 1991. Cortex of  
3 Functional Specialization in Human Visual 17.
- 4 Zimmermann, J., Goebel, R., de Martino, F., van de Moortele, P.F., Feinberg, D., Adriany, G.,  
5 Chaimow, D., Shmuel, A., Uğurbil, K., Yacoub, E., 2011. Mapping the organization of axis  
6 of motion selective features in human area mt using high-field fmri. *PLoS One* 6, 1–10.  
7 <https://doi.org/10.1371/journal.pone.0028716>
- 8
